# Supplementary material
Source: HighWire-hosted journal article supplement (https://bmjopen.bmj.com/content/12/11/e056854)

WCC

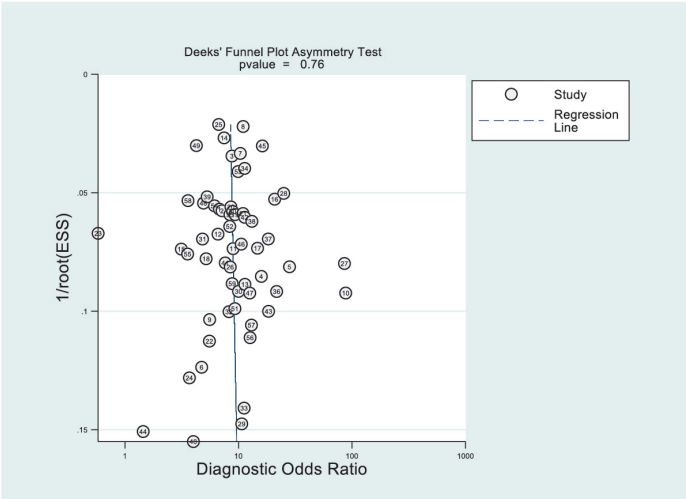

CRP

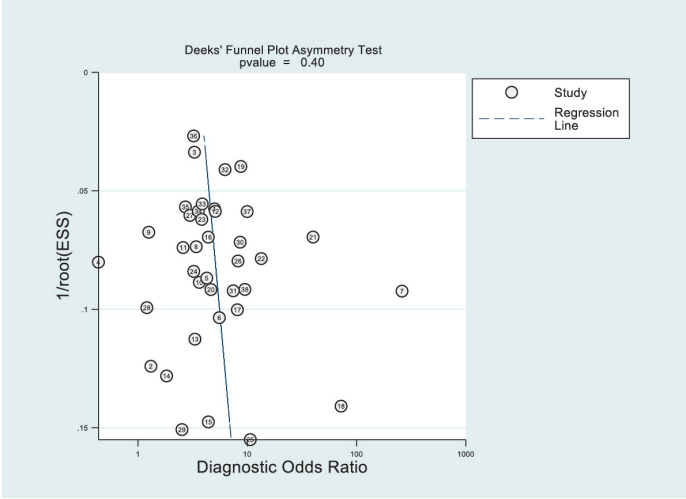

Neutrophils (%)

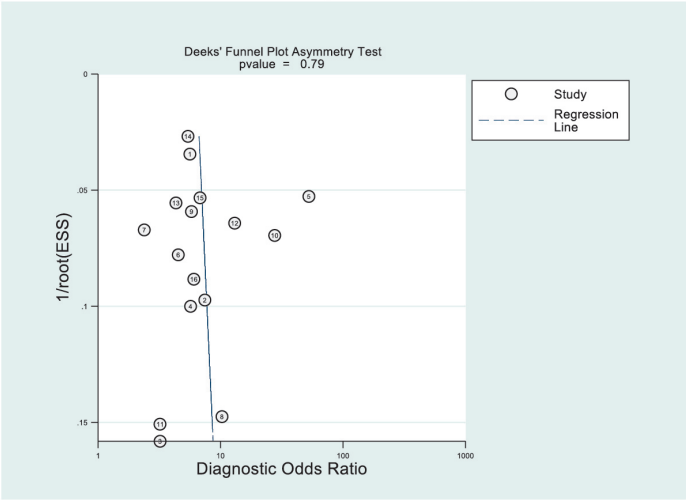

Absolute neutrophil count

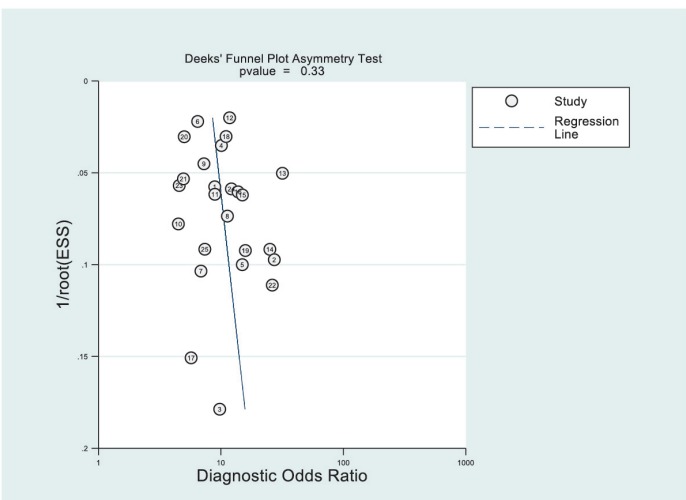

Supplement: inline-supplementary-material-2 [file inline-supplementary-material-2.pdf]
